# Supplementary material for: Agent of Whirling Disease Meets Orphan Worm: Phylogenomic Analyses Firmly Place Myxozoa in Cnidaria
Source: PLOS journal article supplement (doi:10.1371/journal.pone.0054576), 2013-01-30

Figure S4. Maximum likelihood tree calculated with the LG+G+F model based on 26,974 amino acid positions derived from 85 proteins (after excluding the 33% most heterogeneous proteins). Bootstrap values larger than 50% are shown to the right of the nodes.

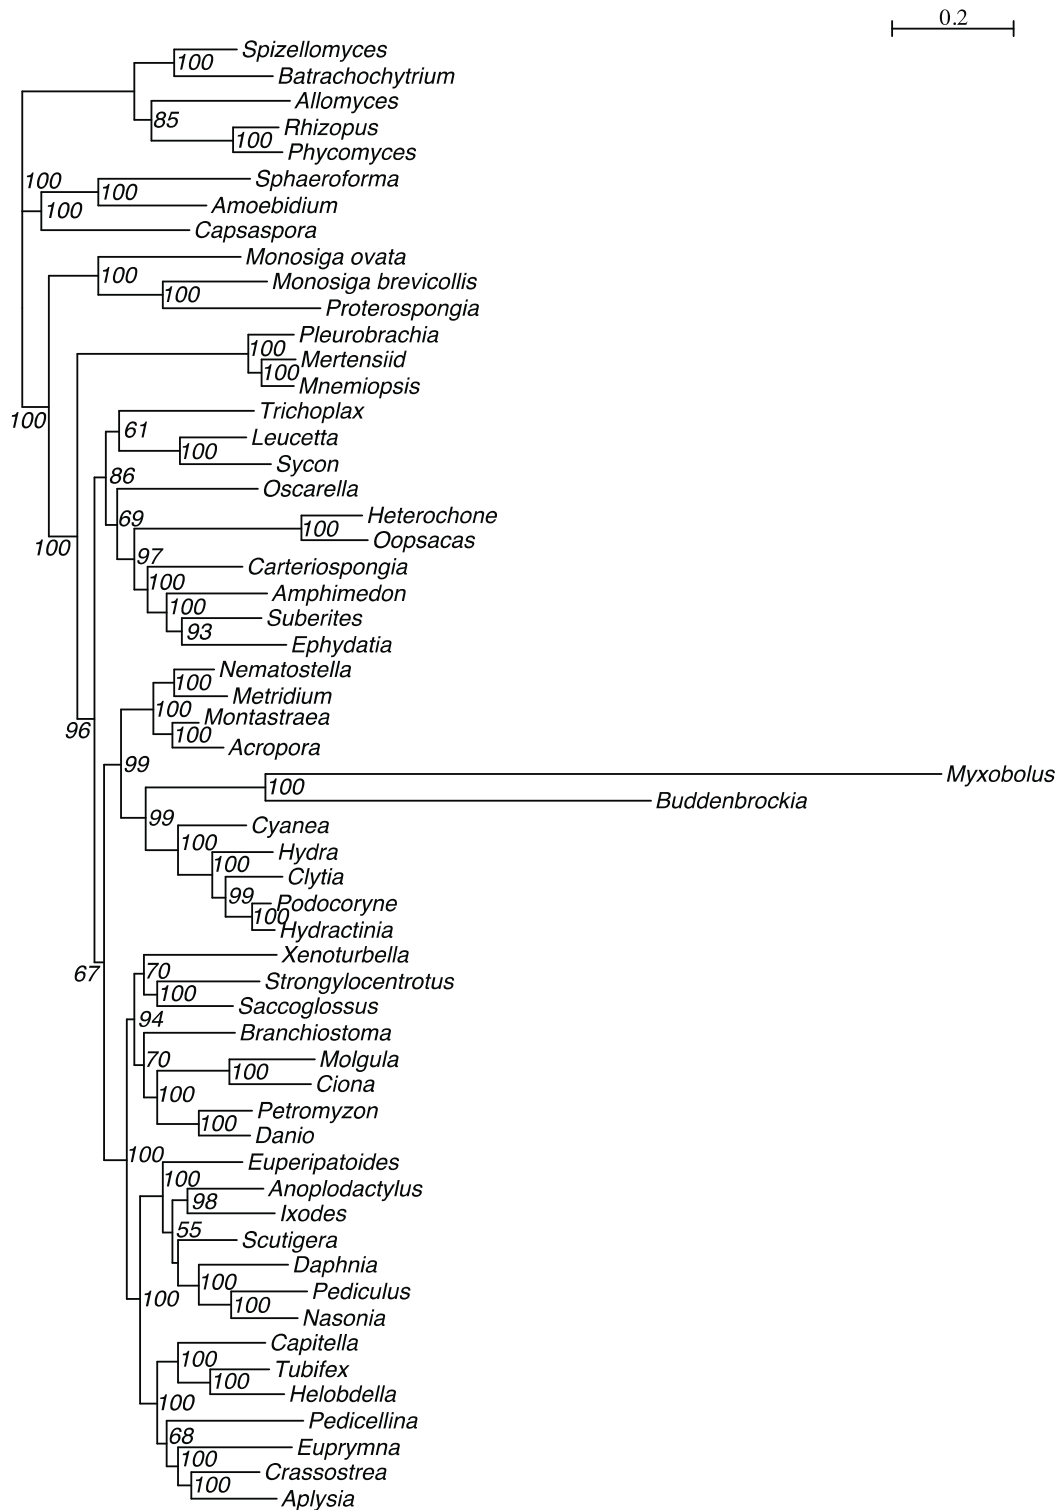

Supplement: S4 (10.1371/journal.pone.0054576.s004) [file journal.pone.0054576.s004]
