# Supplementary material for: Agent of Whirling Disease Meets Orphan Worm: Phylogenomic Analyses Firmly Place Myxozoa in Cnidaria
Source: PLoS One. 2013 Jan 30;8(1):e54576. doi: 10.1371/journal.pone.0054576 (PMC3559788; doi:10.1371/journal.pone.0054576)
Supplement: Table S1 — Protein genes available from the studied taxa. (XLSX) [file pone.0054576.s011.xlsx]

## Sheet: Table S1
Table S1. Protein genes available from the studied taxa.
	ar21	arc20	arp23	atpsynthalpha-a-mt	cct-A	cct-B	cct-D	cct-E	cct-G	cct-N	cct-T	cct-Z	cpn60-mt	crfg	ef2-EF2	eif5a	fibri	grc5	hsp70-E	hsp70-mt	hsp90-C	if1a	if2b	if2g	if4a-a	if4a-b	l12e-A	l12e-C	l12e-D	nsf1-G	nsf1-I	nsf1-J	nsf1-K	nsf1-M	nsf2-A	ornamtrans-a	psma-A	psma-B	psma-C	psma-D	psma-E	psma-F	psma-G	psmb-H	psmb-I	psmb-J	psmb-K	psmb-L	psmb-M
Acropora	X	X	X	X		X	X	X	X	X	X	X	X	X	X	X	X	X	X	X	X	X		X	X	X	X	X	X	X	X	X	X	X	X	X	X	X	X	X	X		X		X	X	X		X
Allomyces	X	X	X	X	X	X	X	X	X	X	X	X	X	X	X	X	X	X	X	X	X	X	X	X	X	X	X	X	X	X	X	X	X	X	X	X	X	X	X	X	X	X	X	X	X	X	X	X	X
Amoebidium				X			X								X			X	X			X	X		X						X		X		X		X		X			X	X	X					X
Anoplodactylus				X	X											X		X				X			X	X	X	X	X											X	X		X	X		X
Aplysia	X	X	X	X	X	X	X	X	X	X	X	X	X	X	X	X	X	X	X	X	X	X	X	X	X	X	X	X	X	X	X	X	X	X	X	X	X	X	X	X	X	X	X	X	X	X	X	X	X
Batrachochytrium	X	X	X	X	X	X	X	X	X	X	X	X	X	X	X	X	X	X	X	X	X	X	X	X	X	X	X	X	X	X	X	X	X	X	X	X	X	X	X	X	X	X	X	X	X	X	X	X	X
Branchiostoma	X	X	X	X	X	X	X	X	X	X	X	X	X	X	X	X	X	X	X	X	X	X	X	X	X	X	X	X	X	X	X	X	X	X	X	X	X	X	X	X	X	X	X	X	X	X	X	X	X
Buddenbrockia											X					X			X	X	X				X				X			X		X	X	X	X						X			X
Capitella	X	X	X	X	X	X	X	X	X	X	X	X	X	X	X	X	X	X	X	X	X	X	X	X	X	X	X	X	X	X	X	X	X	X	X	X	X	X	X	X	X	X	X	X	X	X	X	X	X
Capsaspora	X	X	X	X	X	X	X	X	X	X	X	X	X	X	X	X	X	X	X	X	X	X	X	X	X	X	X	X	X	X	X	X	X	X	X	X	X	X	X	X	X	X	X	X	X	X	X	X	X
Carteriospongia			X	X			X								X	X					X						X						X	X					X					X
Ciona	X	X	X	X	X	X	X	X	X	X	X	X	X	X	X	X	X	X	X	X	X	X	X	X	X	X	X	X	X	X	X	X	X	X	X	X	X	X	X	X	X	X	X	X	X	X	X	X	X
Clytia	X	X	X	X	X	X	X	X	X	X	X	X		X	X			X	X	X	X			X	X	X			X	X	X	X		X						X	X		X		X		X	X	X
Crassostrea	X	X	X	X	X	X	X	X	X	X	X	X	X	X	X	X		X	X	X	X	X	X	X	X	X	X	X	X	X	X	X	X	X	X	X	X	X	X	X	X	X	X	X	X	X	X	X	X
Cyanea	X											X				X																						X				X				X
Danio	X	X	X	X	X	X	X	X	X	X	X	X	X	X	X	X	X	X	X	X	X	X	X	X	X	X	X	X	X	X	X	X	X	X	X	X	X	X	X	X	X	X	X	X	X	X	X	X	X
Daphnia	X	X	X	X	X	X	X	X	X	X	X	X	X	X	X	X	X	X	X	X	X	X	X	X	X	X	X	X	X	X	X	X	X	X	X	X	X	X	X	X	X	X	X	X	X	X	X	X	X
Ephydatia			X			X		X	X	X					X			X			X				X	X	X		X		X				X	X				X							X
Euperipatoides			X	X								X			X	X		X	X								X			X			X							X
Euprymna	X	X	X	X	X	X	X	X	X	X	X	X	X	X	X	X	X	X	X	X	X	X	X	X	X	X	X		X	X	X	X	X	X	X	X	X	X	X	X	X	X	X		X	X	X	X	X
Helobdella	X	X	X	X	X	X	X	X	X	X	X	X	X	X	X	X	X	X	X	X	X	X	X	X	X	X	X	X	X	X	X	X	X	X	X	X	X	X	X	X	X	X	X	X	X	X	X	X	X
Heterochone			X	X		X	X	X	X	X	X	X			X		X		X	X	X			X		X			X	X	X			X	X	X			X	X	X	X					X		X
Hydra	X	X	X	X	X	X	X	X	X	X	X	X	X	X	X	X	X	X	X	X	X	X	X	X	X	X	X	X	X	X	X	X	X	X	X	X	X	X	X	X	X	X	X	X	X	X	X	X	X
Hydractinia			X	X	X		X		X		X	X		X	X	X	X	X	X		X			X	X	X	X	X	X		X	X		X	X	X	X	X			X			X	X			X	X
Ixodes	X	X	X	X	X	X	X	X	X	X	X	X	X	X	X	X	X	X	X	X	X	X	X	X	X	X	X	X	X	X	X	X	X	X	X	X	X	X	X	X	X	X	X	X	X	X	X	X	X
Leucetta	X	X	X	X												X		X			X	X	X			X	X	X	X	X									X	X	X			X	X			X
Mertensiid				X							X		X			X		X							X	X	X	X	X																		X
Metridium	X	X	X	X		X	X	X	X		X	X	X	X	X	X		X	X		X	X			X	X		X	X	X					X		X	X		X		X	X			X		X
Mnemiopsis	X	X	X	X	X	X	X	X	X		X	X	X	X	X	X	X	X				X	X	X		X	X	X	X	X		X	X			X	X	X	X	X	X	X		X	X	X	X	X	X
Molgula	X	X	X	X	X	X	X	X	X	X	X	X	X	X	X		X	X	X	X	X	X	X	X	X	X	X	X	X	X	X	X	X	X	X	X		X	X	X	X	X	X	X	X	X	X	X	X
Monosiga brevicollis	X	X	X	X	X	X	X	X	X	X	X	X	X	X	X	X	X	X	X	X	X	X	X	X	X	X	X	X	X	X	X	X	X	X	X	X	X	X	X	X	X	X	X	X	X	X	X	X	X
Monosiga ovata	X	X	X	X	X	X	X	X	X	X	X	X	X	X	X	X	X	X	X	X	X	X	X	X	X	X	X	X	X	X	X	X	X	X	X	X	X	X	X	X	X		X	X	X	X	X		X
Montastraea																		X									X	X	X
Myxobolus		X			X	X	X	X	X	X	X	X	X	X	X		X	X	X		X		X	X	X		X	X	X	X		X	X	X	X	X			X	X	X				X				X
Nasonia	X	X	X	X	X	X	X	X	X	X	X	X	X	X	X	X	X	X	X	X	X	X	X	X	X	X	X	X	X	X	X	X	X	X	X	X	X	X	X	X	X	X	X	X	X	X	X	X	X
Nematostella	X	X	X	X	X	X	X	X	X	X	X	X	X	X	X	X	X	X	X	X	X	X	X	X	X	X	X	X	X	X	X	X	X	X	X	X	X	X	X	X	X	X	X	X	X	X	X	X	X
Oopsacas			X						X							X													X											X	X					X	X
Oscarella	X		X		X	X	X	X		X		X	X		X	X	X	X	X	X	X	X			X	X					X	X	X	X	X	X	X			X							X	X
Pedicellina				X	X		X			X					X	X		X			X	X	X		X	X	X		X		X			X						X						X			X
Pediculus	X	X	X	X	X	X	X	X	X	X	X	X	X	X	X	X	X	X	X	X	X	X	X	X	X	X	X	X	X	X	X	X	X	X	X	X	X	X	X	X	X	X	X	X	X	X	X	X	X
Petromyzon	X	X	X	X	X	X	X	X	X	X			X	X	X	X	X	X	X	X	X		X	X	X		X	X	X	X	X	X	X	X	X	X	X	X	X	X	X	X	X	X	X	X	X	X	X
Phycomyces	X	X	X	X	X	X	X	X	X	X	X	X	X	X	X	X	X	X	X	X	X	X	X	X	X	X	X	X	X	X	X	X	X	X	X	X	X	X	X	X	X	X	X	X	X	X	X	X	X
Pleurobrachia	X		X	X	X	X	X	X	X	X	X	X	X	X	X	X	X	X	X	X			X	X	X	X		X	X	X	X	X	X	X	X	X	X	X	X		X		X	X	X	X	X	X	X
Podocoryne			X	X	X	X	X			X	X	X	X		X	X		X	X		X				X	X	X	X	X			X					X		X		X	X	X	X	X	X		X	X
Proterospongia	X				X	X					X		X		X		X	X								X		X	X			X	X	X	X				X			X			X	X
Reniera	X	X	X	X	X	X	X	X	X	X	X	X	X	X	X	X	X	X	X	X	X	X	X	X	X	X	X	X	X	X	X	X	X	X	X	X	X	X	X	X	X	X	X	X	X	X	X	X	X
Rhizopus	X	X	X	X	X	X	X	X	X	X	X	X	X	X	X	X	X	X	X	X	X	X	X	X	X	X	X	X	X	X	X	X	X	X	X	X	X	X	X	X	X	X	X	X	X	X	X	X	X
Saccoglossus	X	X	X	X	X	X	X	X	X	X	X	X	X	X	X	X	X	X	X	X	X	X	X	X	X	X	X	X	X	X	X	X	X	X	X	X	X	X	X	X	X	X	X	X	X	X	X	X	X
Scutigera															X			X	X			X		X	X		X		X													X	X			X
Sphaeroforma		X	X	X		X	X	X		X		X	X		X	X	X	X	X	X	X		X	X		X	X	X	X		X	X			X	X	X	X		X	X		X	X	X			X	X
Spizellomyces	X	X	X	X	X	X	X	X	X	X	X	X	X	X	X	X	X	X	X	X	X	X	X	X	X	X	X	X	X	X	X	X	X	X	X	X	X	X	X	X	X	X	X	X	X	X	X	X	X
Strongylocentrotus	X	X	X	X	X	X	X	X	X	X	X	X	X	X	X	X	X	X	X	X	X	X	X	X	X	X	X	X	X	X	X	X	X	X	X	X	X	X	X	X	X	X	X	X	X	X	X	X	X
Suberites	X	X																X	X		X			X			X		X
Sycon	X								X				X		X			X	X		X		X			X	X		X										X	X	X	X						X
Trichoplax	X	X	X	X	X	X	X	X	X	X	X	X	X	X	X	X	X	X	X	X	X	X	X	X	X	X	X	X	X	X	X	X	X	X	X	X	X	X	X	X	X	X	X	X	X	X	X	X	X
Tubifex	X		X	X	X	X	X	X		X		X	X	X	X	X	X	X	X	X	X	X	X	X	X	X	X	X	X		X	X	X	X	X		X	X	X	X	X	X	X	X		X	X		X
Xenoturbella	X	X	X	X		X	X		X		X	X	X	X	X			X	X	X	X	X		X		X	X		X							X			X		X		X			X			X
[truncated: 80 more columns]
